# Supplementary material for: Prognostic value of mitochondrial CKMT2 in Pan-cancer and its tumor immune correlation analysis
Source: Sci Rep. 2024 Jan 3;14:342. doi: 10.1038/s41598-023-46468-3 (PMC10764887; doi:10.1038/s41598-023-46468-3)
Supplement: Supplementary file 2 — Supplementary Information 2. [file 41598_2023_46468_MOESM2_ESM.xlsx]

## Sheet: Sheet1
Tumor name	Gender	Age	Tumor size	Gross type	Neoplasms histologic type	Histopathological grade	T	N	M	Immunohistochemical index	Mismatch repair gene screening
COAD	male	57	7cm*6cm*5cm	adenocarcinoma	protruded type	moderately differentiated	T3	N0	M0
COAD	female	48	2.5cm*2.4cm*1.5cm	adenocarcinoma	protruded type	moderately differentiated	T3	N1a	M1c	P53(-),Ki67(+,40%),CK7(-),CK20(+),Villin(+),S100(+),β-catenin (-)	MLH1(+),PMS2(+),MSH2(+),MSH6(+),pMMR
COAD	female	54	3.5cm*3cm*2cm	adenocarcinoma	polypoid type	moderately differentiated	T2	N0	M0
COAD	female	56	3.8cm*2.8cm*1.5cm	adenocarcinoma	protruded type	moderately differentiated	T3	N1b	M0
COAD	male	59	3.5cm*2.8cm*1cm	adenocarcinoma	ulcerative type	moderately differentiated	T3	N0	M0	P53 (+,50%),Ki67(+,50%),CK7(-),CK20(+),Villin(+),S100(+),β-catenin (-)
COAD	male	52	5cm*3cm*1cm	adenocarcinoma	ulcerative type	moderately differentiated	T3	N0	M0	P53(+,100%),Ki67(+,60%),CK7(-),CK20(+),Villin(+),S100(+),β-catenin (-)	MLH1(+),PMS2(+),MSH2(+),MSH6(+),pMMR
COAD	male	49	5.5cm*4cm*1cm	adenocarcinoma	protruded type	moderately differentiated	T3	N0	M0	P53(+，100%),Ki67(85%+),CK7(-),CK20(+),Villin(+),S100(-),β-catenin (-)	MLH1(+),PMS2(+),MSH2(+),MSH6(-),dMMR
COAD	female	48	5.1cm*3.6cm*3.3cm	adenocarcinoma		moderately differentiated	T3	N1a	M0	P53(50%+),Ki67(30%+),CK7(-),CK20(+),Villin(+),S100(-),β-catenin (-)	MLH1(+),PMS2(+),MSH2(+),MSH6(+),pMMR
COAD	male	54	7cm*7cm*1cm	adenocarcinoma	ulcerative type	moderately differentiated	T3	N0	M0	P53(+40%),Ki67(+,80%),CK7(-),CK20(+),Villin(+),S100(+),β-catenin (+)	MLH1(-),PMS2(-),MSH2(+),MSH6(+),dMMR
COAD	male	54	5.4cm*3.6cm*1.1cm	adenocarcinoma	ulcerative type	moderately differentiated	T3	N2b	M0
COAD	male	58	2.4cm*1.8cm*0.8cm	adenocarcinoma	protruded type	moderately differentiated	T2	N0	M0	P53(70%+),Ki67(50%+),CK7(-),CK20(+),Villin(+),S100(-),β-catenin(-)	MLH1(+),PMS2(+),MSH2(+),MSH6(+),pMMR
COAD	female	59	4.5cm*3cm*0.3cm	adenocarcinoma	ulcerative type	moderately differentiated	T3	N0	M0
COAD	female	60	4.3cm*3.5cm*0.8cm	adenocarcinoma	ulcerative type	moderately differentiated	T3	N2b	M0	P53(-),Ki67(+,50%),CK7(-),CK20(+),Villin(+),S100(+),β-catenin (+)	MLH1(+),PMS2(+),MSH2(+),MSH6(+),pMMR
COAD	male	54	4cm*3.5cm*1.3cm	adenocarcinoma	ulcerative type	moderately differentiated	T3	N0	M1a	CK7(-),CK20(+),Villin(+),S100(-)	MLH1(+),PMS2(+),MSH2(+),MSH6(+),pMMR
COAD	female	50	5.8cm*5cm*1.2cm	adenocarcinoma	ulcerative type	poorly differentiated	T3	N1b	M0	P53(+,100%),Ki67(+,90%),CK7(-),CK20(+), Villin(+),S100(+),β-catenin (-)	MLH1(+),PMS2(+),MSH2(+),MSH6(+),pMMR
COAD	male	52	5.2cm*4.3cm*0.6cm	adenocarcinoma	ulcerative type	moderately differentiated	T3	N0	M0
COAD	male	56	0.7cm	adenocarcinoma	ulcerative type	moderately differentiated	T1	N0	M0
COAD	male	56	7.3cm*3.2cm*1.1cm	adenocarcinoma	ulcerative type	moderately differentiated	T3	N1	M0	P53(+,40%),Ki67(+,40%),CK7(+),CK20(+),Villin(+),S100(+),β-catenin(+)	MLH1(+),PMS2(+),MSH2(+),MSH6(+),pMMR
COAD	male	46	4.3cm*3.6cm*1.2cm	adenocarcinoma	ulcerative type	moderately differentiated	T3	N0	M0	P53(-),Ki67(+,30%),CK7(-),CK20(+),Villin(+),β-catenin (-)	MLH1(+),PMS2(+),MSH2(+),MSH6(+),pMMR
COAD	female	58	4cm*2.8cm*1cm	adenocarcinoma	ulcerative type	moderately differentiated	T3	N0	M0		MLH1(+),PMS2(-),MSH2(+),MSH6(+,<1%),dMMR
READ	male	60	5.7cm*5cm*1.5cm	adenocarcinoma	ulcerative type	poorly differentiated	T3	N0	M0
READ	female	60	1.5cm*1.5cm*1cm	adenocarcinoma		moderately differentiated	T1	N0	M0	P53(+,90%),Ki67(+,70%),CK7(-),CK20(+),Villin(+),S100(-),β-catenin(+)	MLH1(+),PMS2(+),MSH2(+),MSH6(+),pMMR
READ	male	44	6.5cm*3.5cm*1.8cm	adenocarcinoma	protruded type	moderately differentiated	T2	N0	M0	P53(+,80%),Ki67(+,60%),CK7(-),CK20(+)，Villin(+),S100(+),β-catenin (+)	MLH1(+),PMS2(+),MSH2(+),MSH6(+),pMMR
READ	male	54	5cm*4cm*4cm	adenocarcinoma	protruded type	well-differentiated	T1	N0	M0	P53(+,10%),Ki67(+,80%),CK7(-),CK20(+),Villin(+),S100(-),β-catenin (+)	MLH1(+),PMS2(+),MSH2(+),MSH6(+),pMMR
READ	male	54	3.3cm*2.4cm*2cm	adenocarcinoma	ulcerative type	moderately differentiated	T2	N0	M0
READ	male	54	7.5cm*5.5cm*5.5cm	adenocarcinoma	ulcerative type	moderately differentiated	T3	N2a	M1a	CK7(-),CK20(+),Villin(+),β-catenin (-)
READ	male	72	6cm*4.7cm*0.6cm	adenocarcinoma	ulcerative type	moderately differentiated	T3	N1b	M0	P53(+,30%).Ki67(+,30%).S100(+)
READ	female	61	3.5cm*2.5cm*1.2cm	adenocarcinoma	protruded type	moderately differentiated	T3	N1b	M0	P53(+,90%),Ki67(+,70%),CK7(-),CK20(+),Villin(+),S100(+),β-catenin (-)
READ	male	59	4.3cm*3.8cm*0.7cm	adenocarcinoma	ulcerative type	moderately differentiated	T3	N1a	M0	P53(+,30%),Ki67(+,70%),CK7(-),CK20(-),Villin(+),S100(+)，β-catenin (+)	MLH1(+),PMS2(+),MSH2(+),MSH6(+),pMMR
READ	male	60	3.8cm*2.9cm*1.6cm	adenocarcinoma	ulcerative type	moderately differentiated	T3	N1b	M0	P53(+),CK7(-),CK20(+),Villin(+),β-catenin (+)	MLH1(+),PMS2(+),MSH2(+),MSH6(+),pMMR
READ	male	46	5.5cm*3.2cm*3cm	adenocarcinoma		moderately differentiated	T3	N1a	M0	P53(-),Ki67(70%+),CK7(-),CK20(+),Villin(+),S100(+),β-catenin (-)	MLH1(+),PMS2(+),MSH2(+),MSH6(+),pMMR
READ	male	55	3.5cm*2.5cm*0.7cm	adenocarcinoma		moderately differentiated	T2	N0	M0	P53(+,100%),Ki67(+,90%),CK7(-),CK20(+),Villin(+),S100(+),β-catenin (-)	MLH1(+),PMS2(+),MSH2(+),MSH6(+),pMMR
